# Supplementary material for: Basil Polysaccharide Reverses Development of Experimental Model of Sepsis‐Induced Secondary Staphylococcus aureus Pneumonia
Source: Hindawi journal article supplement (doi:10.1155/2021/5596339), 2021-01-01
Supplement: f1 [file 5596339.f1.pdf]

A

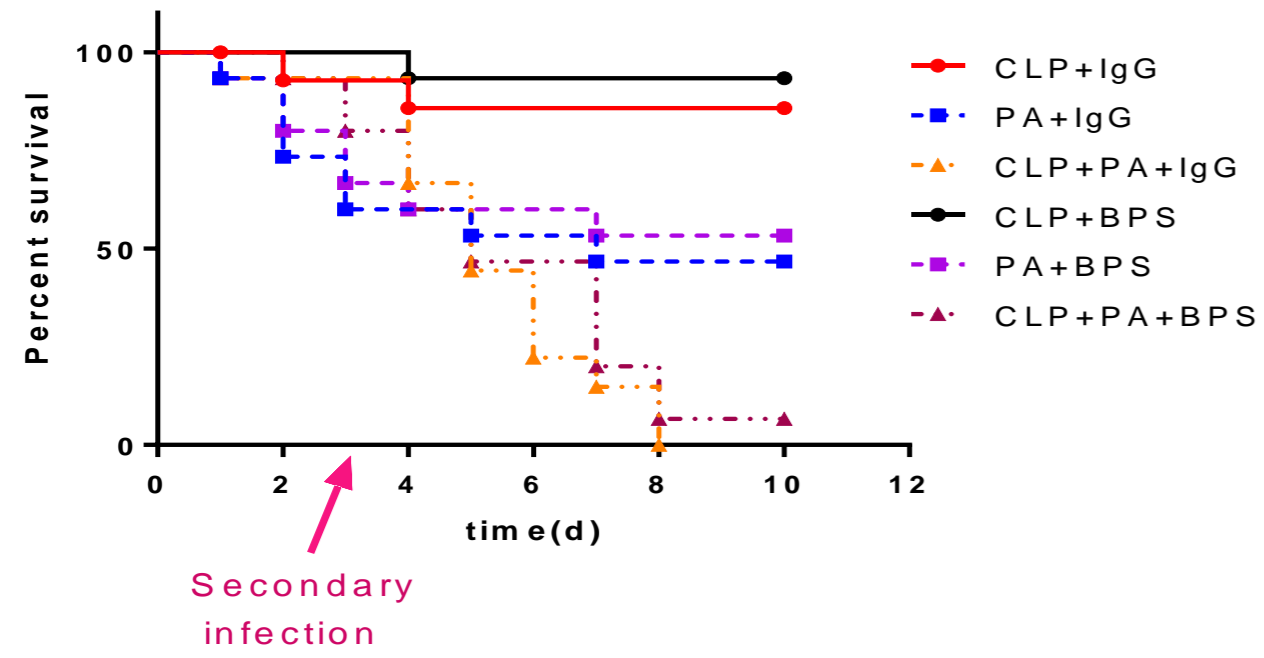

B

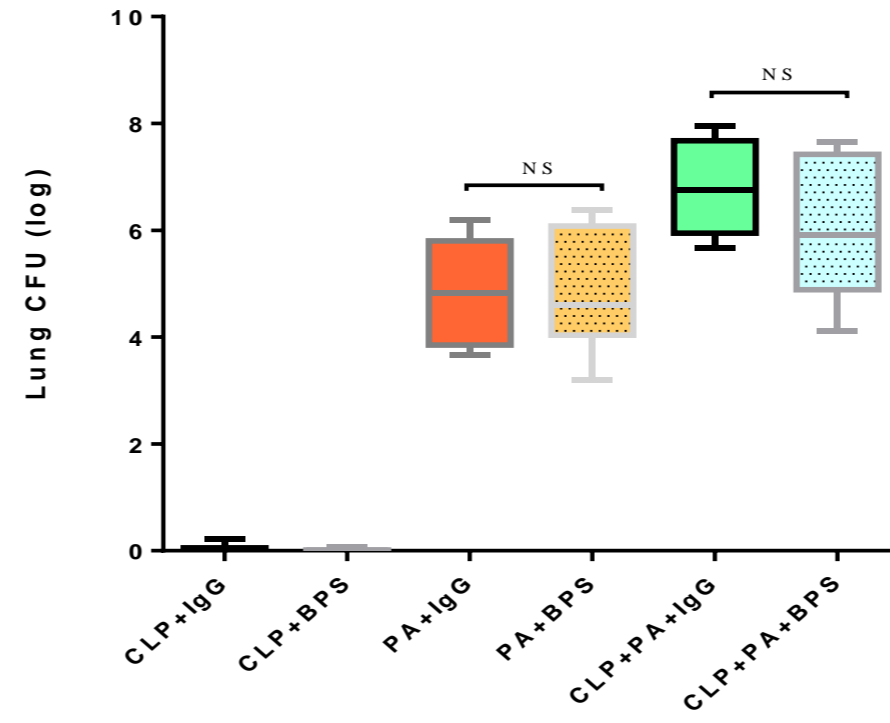

C

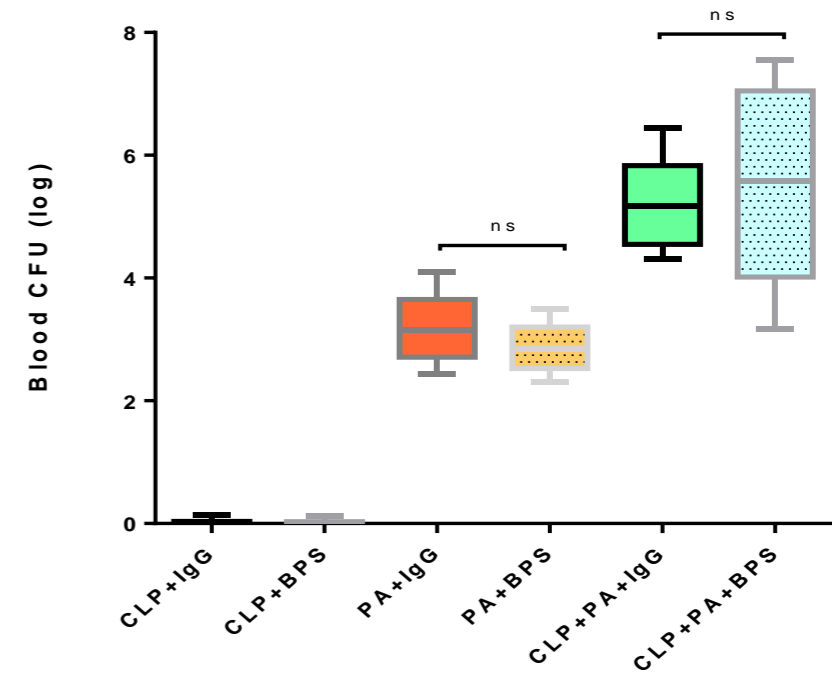

D

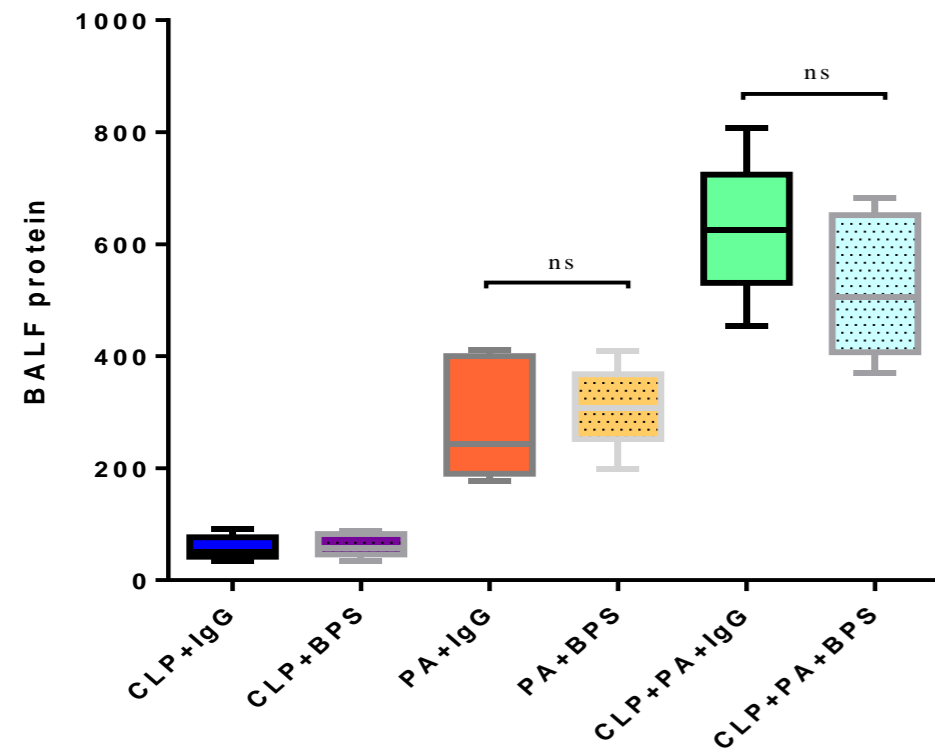

E

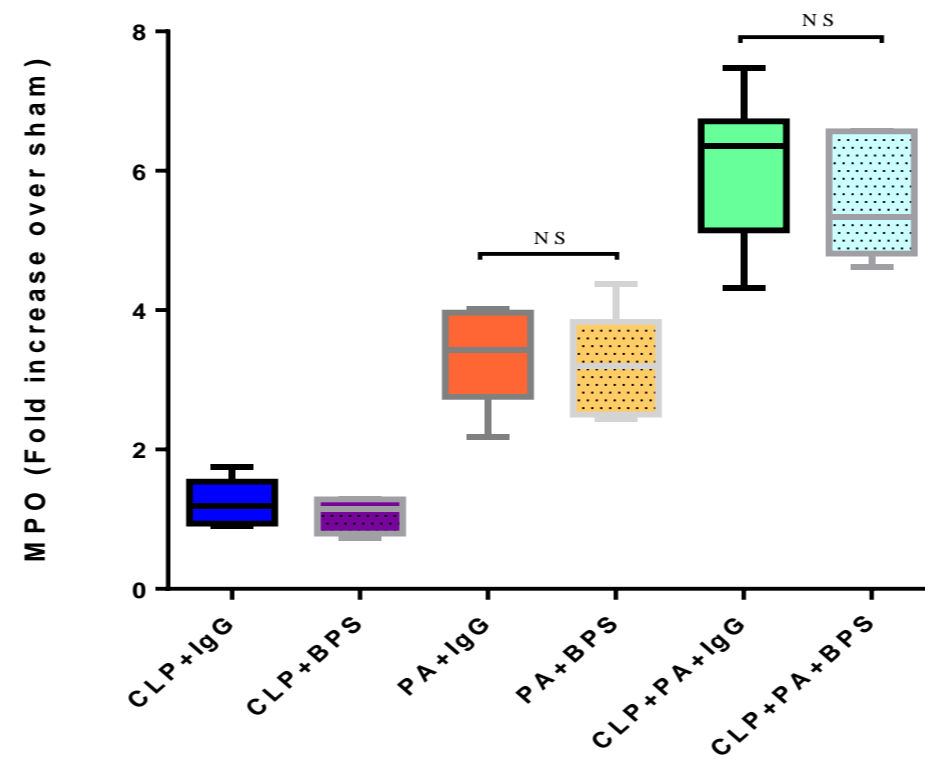

F

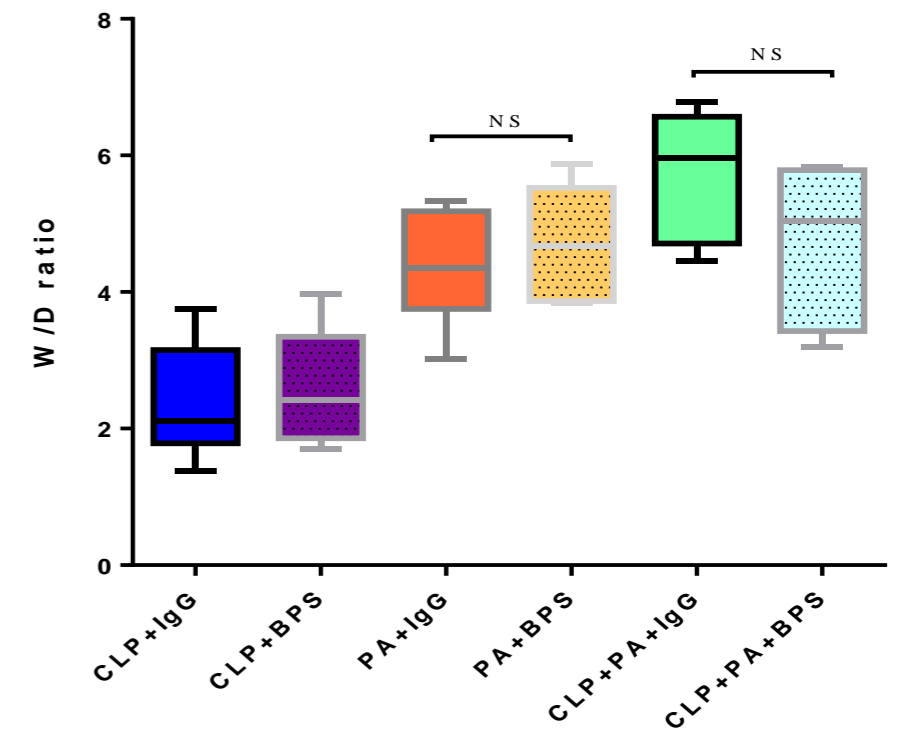

Supplementary figure

## Supplementary Figure Legend

(A) Following *P. aeruginosa* infection (n = 15 for every group), we observed mortality rate over the 10-day period. (B-C) Lung or BALF bacterial CFU in each group after challenge with *P. aeruginosa* (n = 5 mice/group). (D-E) Lung injury assessment indicators such as protein in BALF, Myeloperoxidase, and Wet/dry weight ratio in the left lung were measured after challenge with *P. aeruginosa* (n = 5 mice/group). \*p<0.05, \*\*p<0.01, \*\*\*p<0.001, upon one-way ANOVA as well as LSD multiple comparisons. Compared with *S. aureus* infection treated with basil polysaccharide group or CLP-surgery mice upon secondary *S. aureus* infection treated with basil polysaccharide group. ns, no statistical significance between the groups challenged with *P. aeruginosa*.
